# Supplementary material
Source: HighWire-hosted journal article supplement (https://www.annfammed.org/highwire/filestream/15252/field_highwire_adjunct_files/0/Ebell_Supp.pdf)

Supplemental Table 1. Comparison of patient characteristics for the original derivation cohort and the Québec validation cohort showing only complete cases for each group.

| Comparator                                 | COVID-NoLab risk score |               | COVID-SimpleLab risk score |                  |
|--------------------------------------------|------------------------|---------------|----------------------------|------------------|
|                                            | Derivation cohort      | Québec cohort | Derivation cohort          | Québec cohort    |
| Number                                     | 1343                   | 588           | 740                        | 479              |
| Deaths (%)                                 | 13.8%                  | 10.5%         | 14.3%                      | 11.3%            |
| Age: mean (SD)                             | 60.4 (17.3)            | 66.0 (18.4)   | 61.4 (16.8)                | 66.7 (17.8)      |
| Respiratory rate: median (IQR)             | 20 (18, 24)            | 20 (18, 24)   | 20 (18, 24)                | 20 (18, 26)      |
| O <sub>2</sub> saturation: median (IQR)    | 96 (93, 97)            | 95 (93, 97)   | 96 (94, 98)                | 95 (93, 97)      |
| WBC (cells/10 <sup>9</sup> ): median (IQR) |                        |               | 6.4 (4.8, 8.6)             | 6.6 (4.8, 9.0)   |
| CRP (mg/dl): median (IQR)                  |                        |               | 7.4 (2.9, 13.7)            | 5.6 (1.9, 11.8)  |
| Serum creatinine (mg/dl): median (IQR)     |                        |               | 1.01 (0.81, 1.42)          | 0.92 (0.72, 1.2) |
| Comorbid asthma (%)                        |                        |               | 11.9%                      | 11.1%            |

SD=standard deviation; IQR = interquartile range; WBC=white blood cell count; CRP=c-reactive protein

Supplemental Table 2. Results for all risk scores by point level.

| <b>COVIDNoLab risk score</b>     |                 |              |              |                    |
|----------------------------------|-----------------|--------------|--------------|--------------------|
| <b>Points</b>                    | <b>Survivor</b> | <b>Death</b> | <b>Total</b> | <b>% mortality</b> |
| 0                                | 94              | 1            | 95           | 1.1%               |
| 2                                | 10              | 0            | 10           | 0.0%               |
| 3                                | 113             | 4            | 117          | 3.4%               |
| 5                                | 216             | 32           | 248          | 12.9%              |
| 6                                | 8               | 0            | 8            | 0.0%               |
| 7                                | 41              | 8            | 49           | 16.3%              |
| 8                                | 32              | 8            | 40           | 20.0%              |
| 10                               | 12              | 9            | 21           | 42.9%              |
|                                  | 526             | 62           |              |                    |
|                                  |                 |              |              |                    |
| <b>COVIDSimpleLab risk score</b> |                 |              |              |                    |
| <b>Points</b>                    | <b>Survivor</b> | <b>Death</b> | <b>Total</b> | <b>% mortality</b> |
| 0                                | 41              | 0            | 41           | 0.0%               |
| 3                                | 4               | 0            | 4            | 0.0%               |
| 4                                | 13              | 0            | 13           | 0.0%               |
| 5                                | 12              | 0            | 12           | 0.0%               |
| 6                                | 54              | 0            | 54           | 0.0%               |
| 7                                | 2               | 0            | 2            | 0.0%               |
| 8                                | 95              | 12           | 107          | 11.2%              |
| 9                                | 4               | 1            | 5            | 20.0%              |
| 10                               | 19              | 1            | 20           | 5.0%               |
| 11                               | 29              | 2            | 31           | 6.5%               |
| 12                               | 31              | 7            | 38           | 18.4%              |
| 13                               | 24              | 5            | 29           | 17.2%              |
| 14                               | 10              | 1            | 11           | 9.1%               |
| 15                               | 14              | 2            | 16           | 12.5%              |
| 16                               | 17              | 2            | 19           | 10.5%              |
| 17                               | 14              | 6            | 20           | 30.0%              |
| 18                               | 11              | 4            | 15           | 26.7%              |
| 19                               | 4               | 0            | 4            | 0.0%               |
| 20                               | 14              | 0            | 14           | 0.0%               |
| 21                               | 2               | 1            | 3            | 33.3%              |
| 22                               | 5               | 2            | 7            | 28.6%              |
| 23                               | 1               | 1            | 2            | 50.0%              |
| 24                               | 2               | 0            | 2            | 0.0%               |

|    |     |    |   |        |
|----|-----|----|---|--------|
| 25 | 2   | 4  | 6 | 66.7%  |
| 26 | 0   | 1  | 1 | 100.0% |
| 29 | 0   | 2  | 2 | 100.0% |
| 30 | 1   | 0  | 1 | 0.0%   |
|    | 425 | 54 |   |        |

Supplemental Table 3. Comparison of accuracy between early and late subcohorts. Early cohort was admitted between March 8, 2020 and July 14, 2020, and the late cohort was admitted between July 15, 2020 to February 22, 2021.

| <b>Risk Group</b>      | <b>Early cohort<br/>deaths/total (%)</b> | <b>Late cohort<br/>deaths/total (%)</b> | <b><i>p</i><sup>*</sup></b> |
|------------------------|------------------------------------------|-----------------------------------------|-----------------------------|
| <b>COVID-NoLab</b>     |                                          |                                         |                             |
| Low (0-1)              | 0/45 (0.0%)                              | 1/50 (2.0%)                             | 0.340                       |
| Moderate (2-5)         | 18/198 (9.1%)                            | 18/177 (10.2%)                          | 0.723                       |
| High (6+)              | 15/69 (21.7%)                            | 10/49 (20.4%)                           | 0.862                       |
| <b>COVID-SimpleLab</b> |                                          |                                         |                             |
| Low (0-7)              | 0/76 (0.0%)                              | 0/50 (0.0%)                             | 0.767                       |
| Moderate (8-11)        | 8/108 (7.4%)                             | 8/55 (14.5%)                            | 0.148                       |
| High (12+)             | 22/106 (20.8%)                           | 16/84 (19.0%)                           | 0.770                       |

\* Pearson Chi-Square test

Supplemental Table 4. Comparison of accuracy between admitted and non-admitted patients.

| <b>Risk Group</b>      | <b>Admitted</b> | <b>Non-Admitted</b> | <b>p</b> |
|------------------------|-----------------|---------------------|----------|
| <b>COVID-NoLab</b>     |                 |                     |          |
| Low (0-1)              | 1/65 (1.5%)     | 0/30 (0.0%)         | 0.495    |
| Moderate (2-5)         | 35/294 (11.9%)  | 1/68 (0.015%)       | 0.010    |
| High (6+)              | 25/114 (21.9%)  | 0/4 (0.0%)          | 0.291    |
| <b>COVID-SimpleLab</b> |                 |                     |          |
| Low (0-7)              | 0/83 (0.0%)     | 0/43 (0.0%)         | 0.639    |
| Moderate (8-11)        | 16/140 (11.4%)  | 0/22 (0.0%)         | 0.095    |
| High (12+)             | 38/178 (21.3%)  | 0/10 (0.0%)         | 0.102    |

\* Pearson Chi-Square test

**Supplemental Figures 1a and 1b. Receiver operating characteristic curves for COVID-NoLab (1a) and COVID-SimpleLab (1b) risk scores.**

**Supplemental Figure 1a. COVID-NoLab risk score**

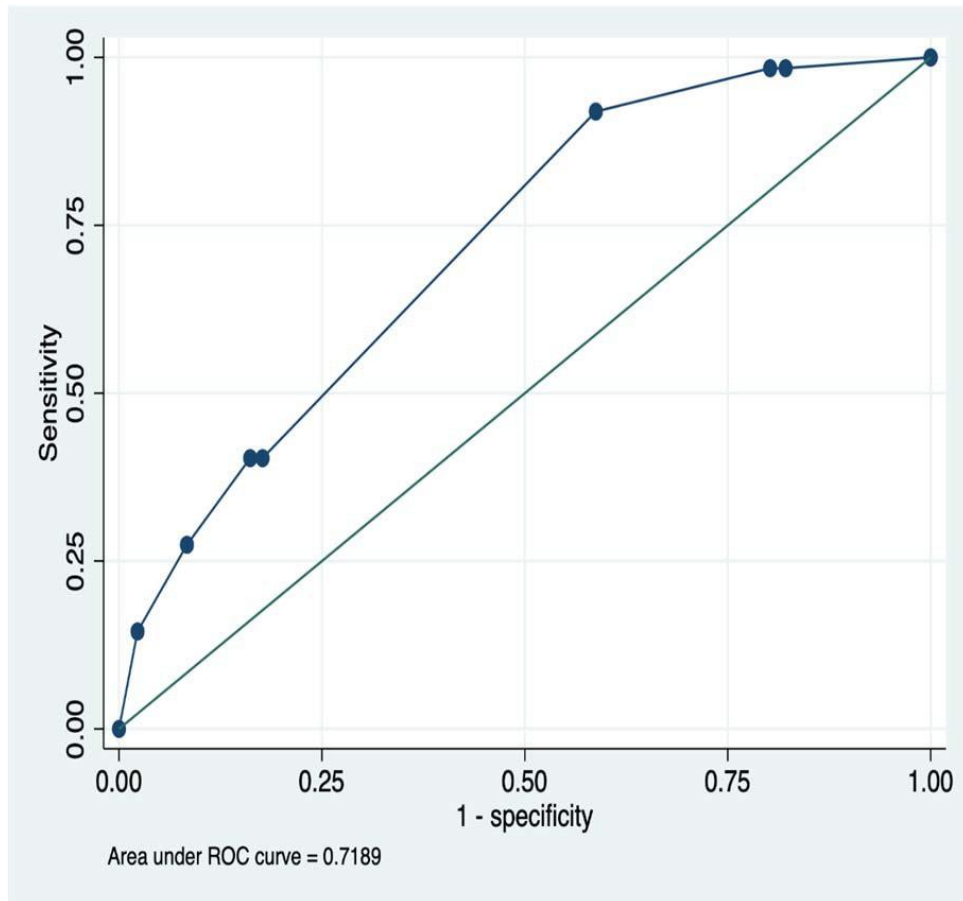

Supplemental Figure 1b. COVID-SimpleLab risk score

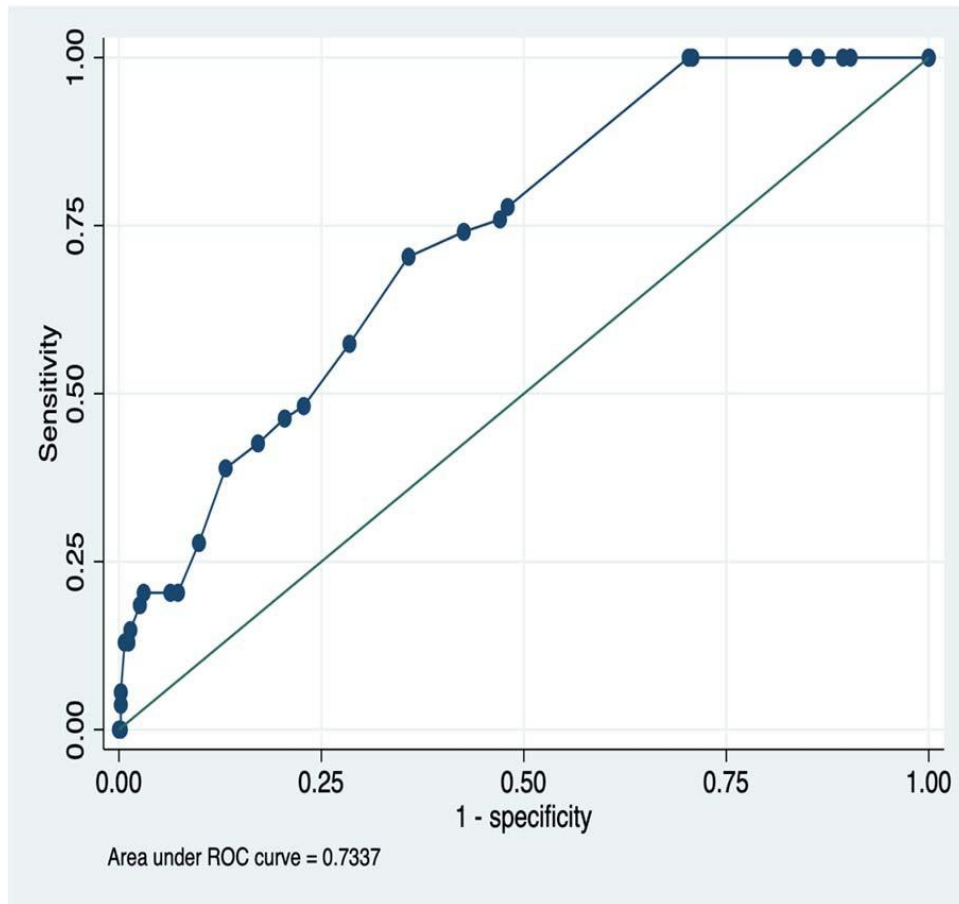

Supplement: Ebell_Supp.pdf [file Ebell_Supp.pdf]
